# Supplementary material
Source: PubMed Central journal article supplement (PMC7837284)
Supplement: NIHMS1597077-supplement-Supplemental_Material.pdf [file NIHMS1597077-supplement-Supplemental_Material.pdf]

**Supplementary Figure S-1. Construction of the study sample.**

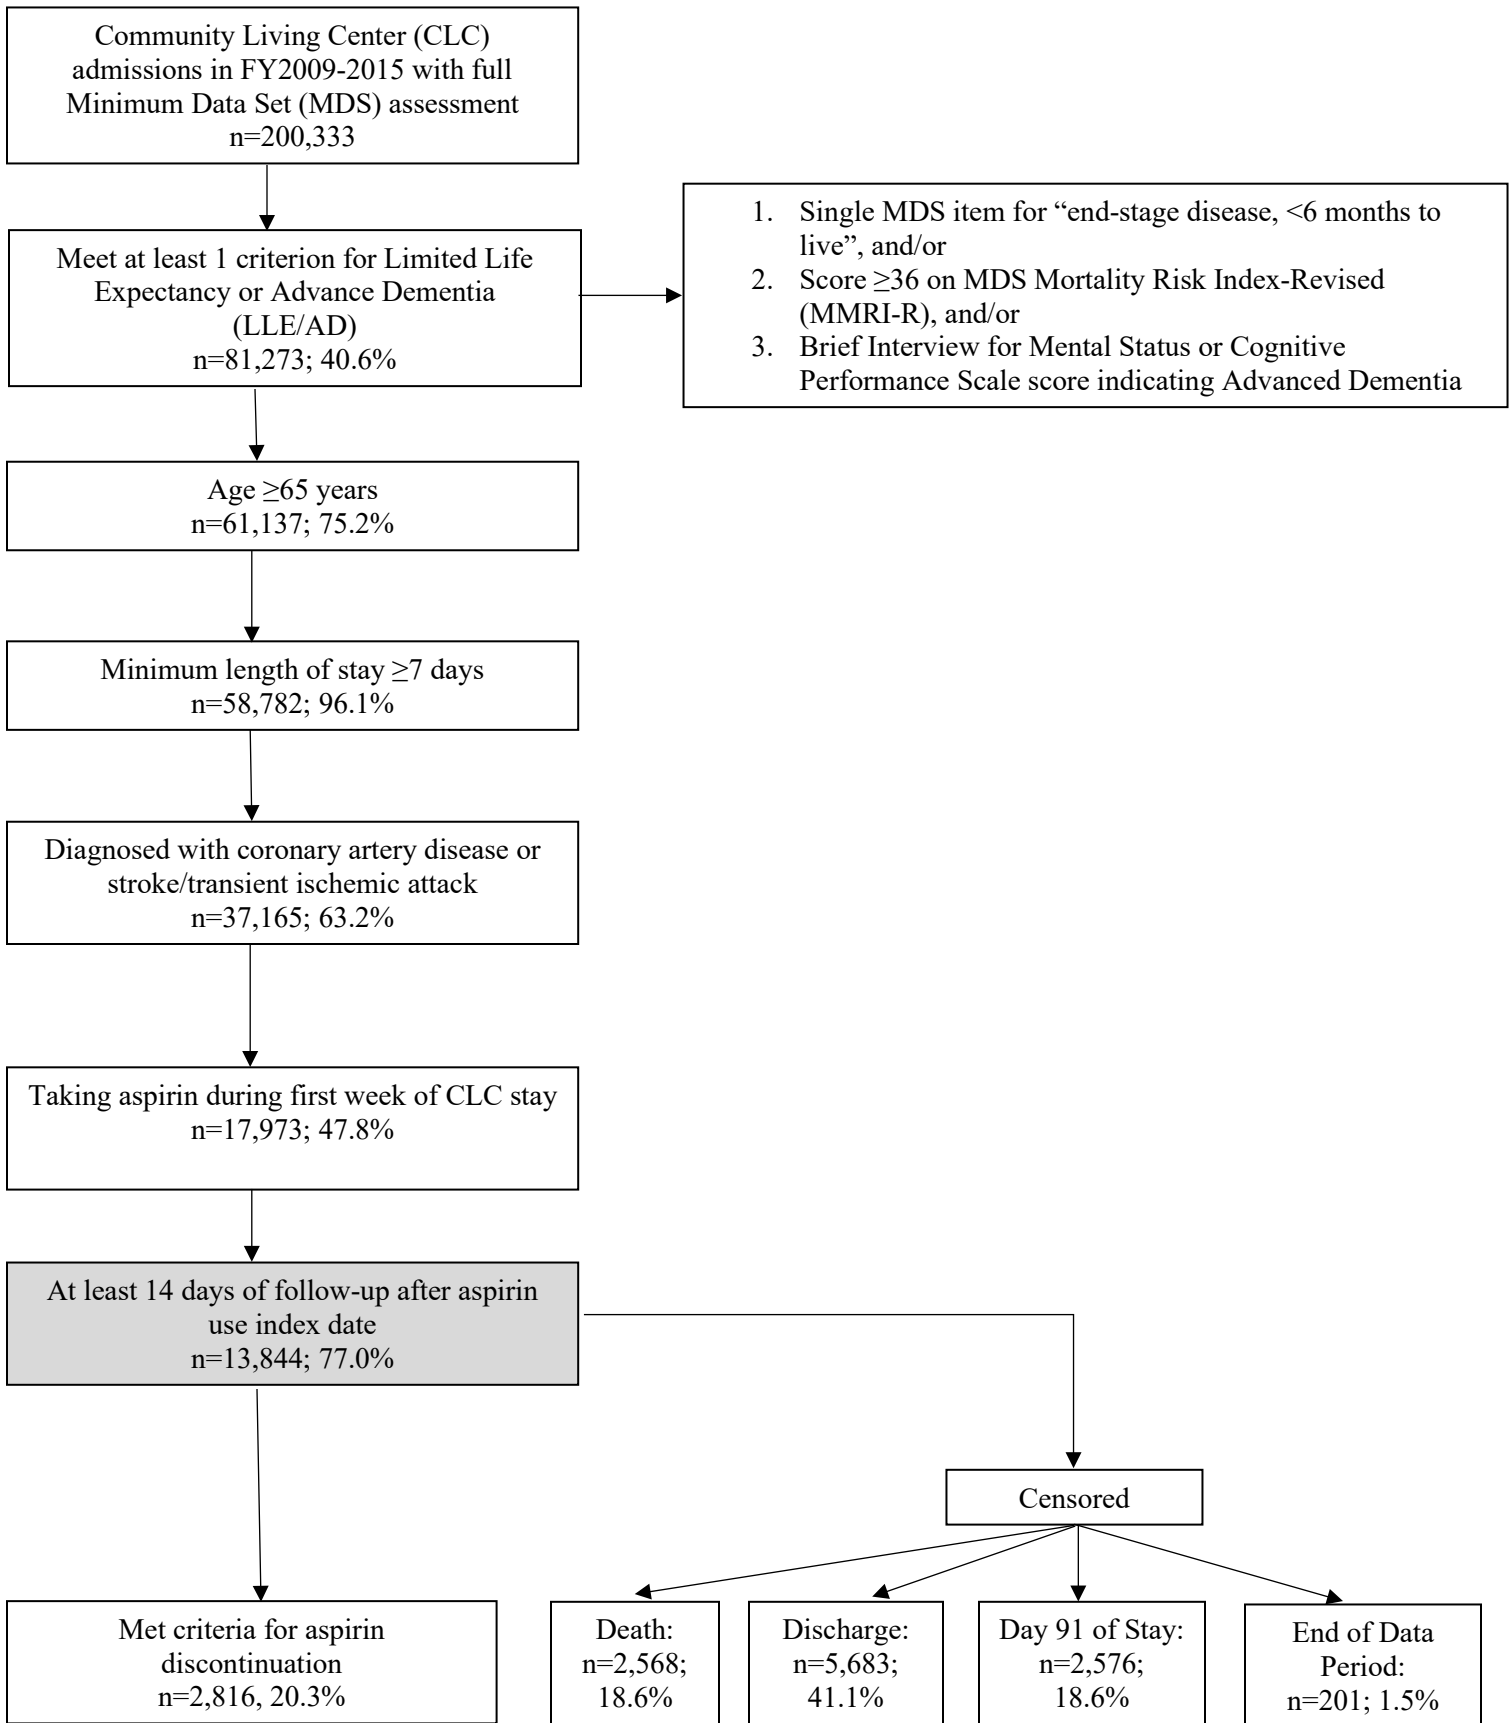

Supplementary Figure S-2. Cumulative incidence of aspirin discontinuation, using primary discontinuation definition requiring a 14-day gap in use (N=13,844).

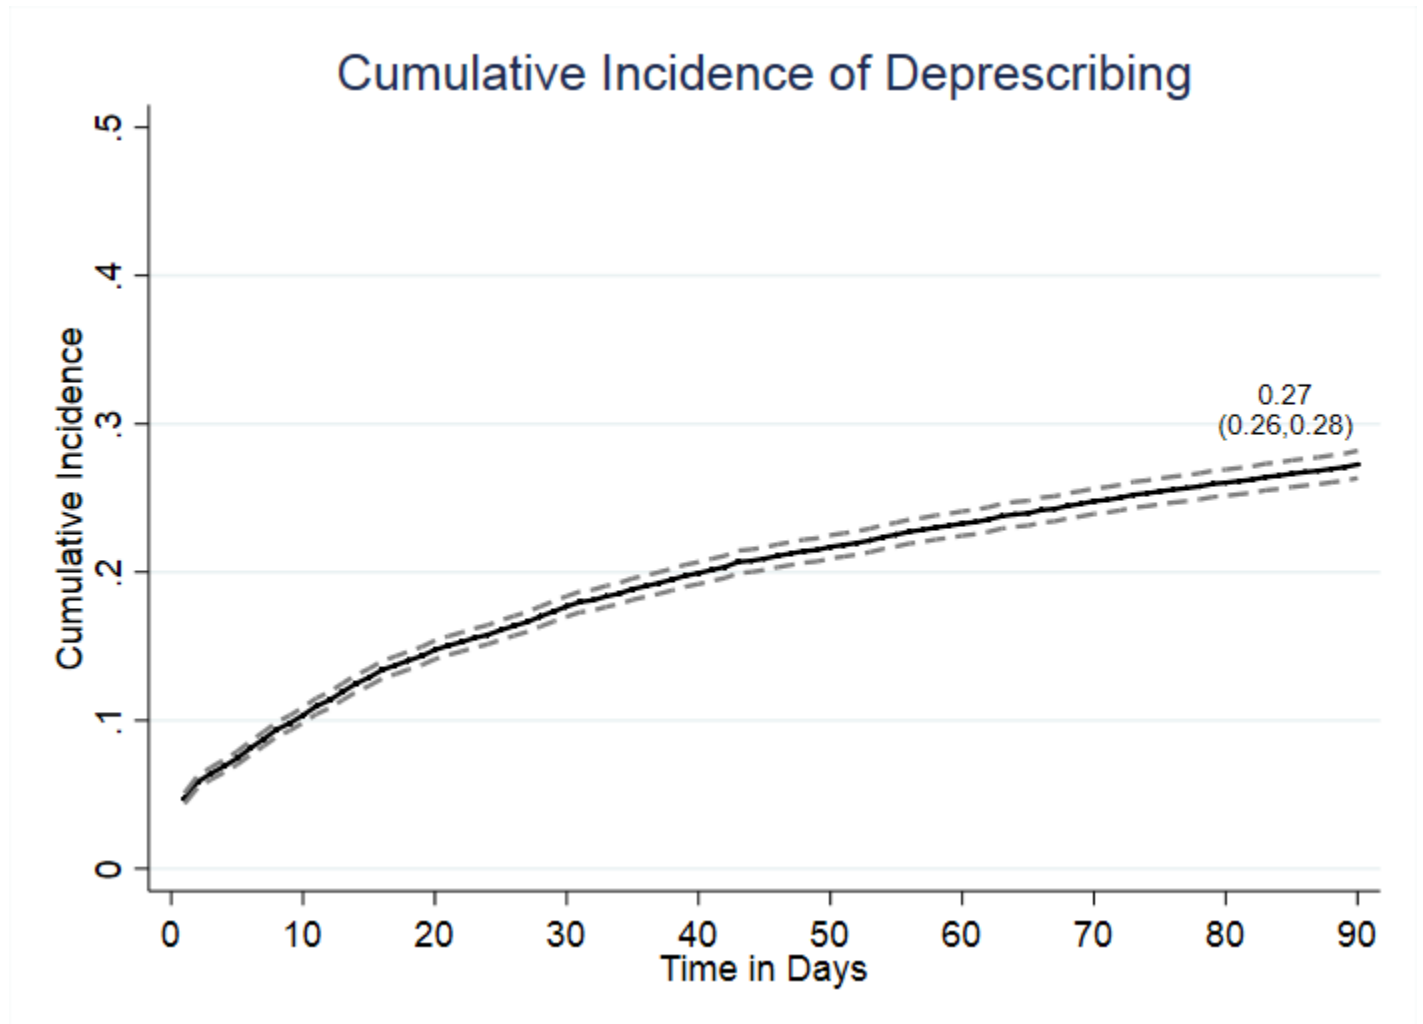

Supplementary Figure S-3. Cumulative incidence of aspirin discontinuation, using alternative definition requiring a 30-day gap in use (n=9,430).

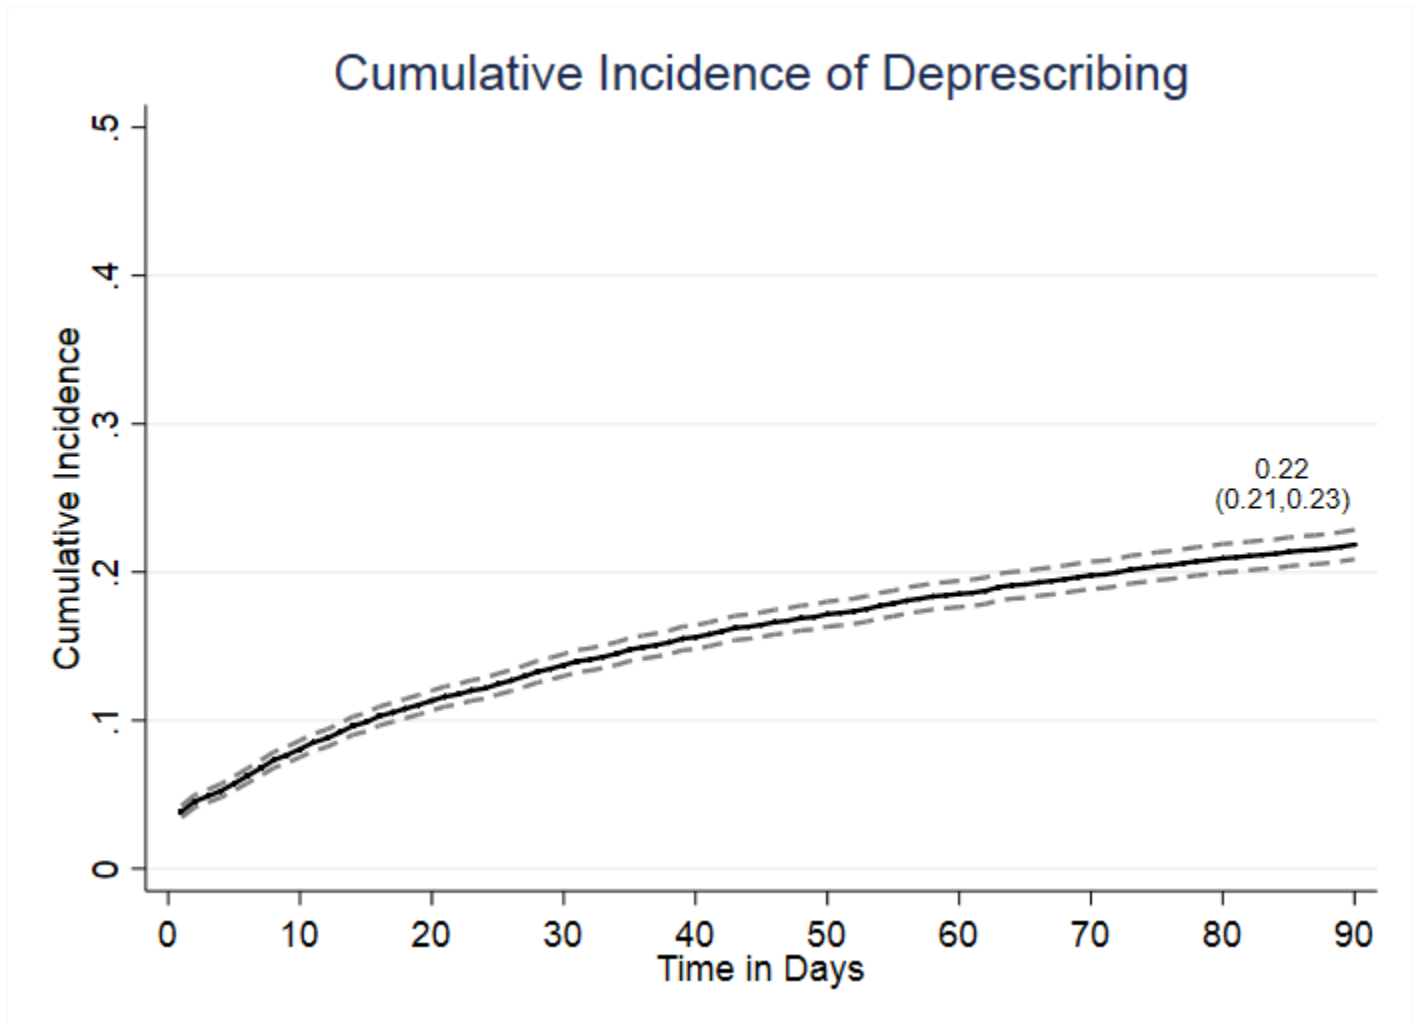

Supplementary Figure S-4. Cumulative incidence of aspirin discontinuation, using alternative discontinuation variable requiring a 30-day gap in use, stratified by explicit documentation of limited prognosis (LP) at admission (N=9,430).

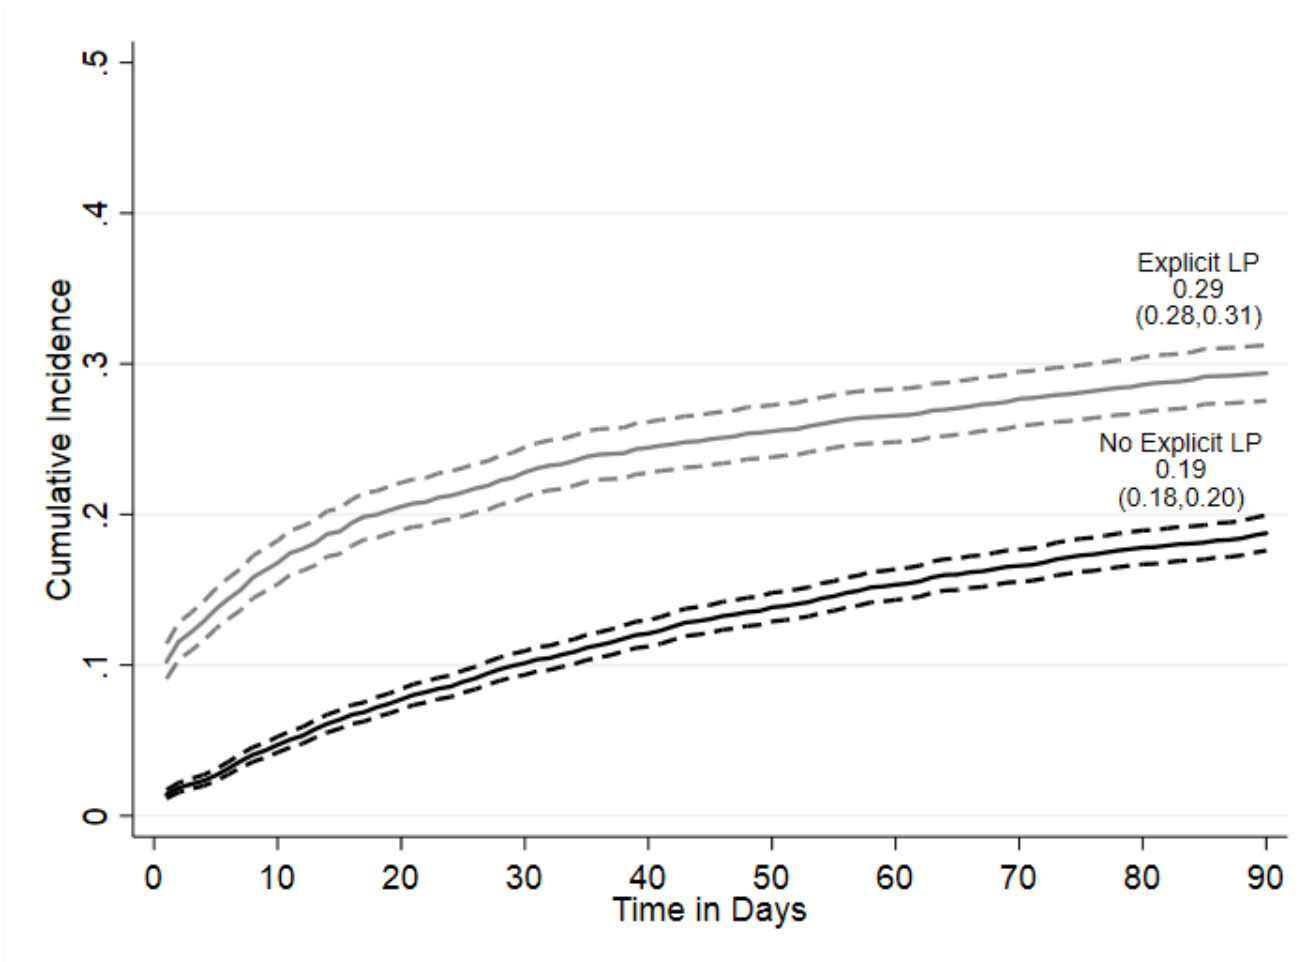

**Supplementary Table S-1: Primary analyses of multivariable subdistribution hazard ratios (SDHRs) for predictors of discontinuation of aspirin, stratified by explicit documentation of limited prognosis at admission (n=13,844), using discontinuation variable requiring 14-day gap in use**

|                                                      | Explicit Documentation of Limited Prognosis n=4,092 | No Explicit Documentation of Limited Prognosis n=9,752 |
|------------------------------------------------------|-----------------------------------------------------|--------------------------------------------------------|
| <b>Demographics</b>                                  | <b>aSDHR (95% CI)</b>                               | <b>aSDHR (95% CI)</b>                                  |
| <b>Age at admission</b>                              |                                                     |                                                        |
| 65-74                                                | Ref                                                 | Ref                                                    |
| 75-84                                                | 0.91 (0.78-1.06)                                    | 0.93 (0.83-1.05)                                       |
| ≥85                                                  | 0.83 (0.71-0.97)*                                   | 0.98 (0.86-1.13)                                       |
| <b>Sex</b>                                           |                                                     |                                                        |
| Female                                               | 1.06 (0.71-1.58)                                    | 0.88 (0.49-1.60)                                       |
| <b>Race/ethnicity</b>                                |                                                     |                                                        |
| White                                                | Ref                                                 | Ref                                                    |
| Black                                                | 1.20 (1.01-1.44)*                                   | 0.94 (0.82-1.09)                                       |
| Hispanic                                             | 1.32 (0.97-1.79)                                    | 1.49 (1.16-1.91)**                                     |
| Other                                                | 1.27 (0.86-1.89)                                    | 1.27 (0.95-1.69)                                       |
| <b>Marital status</b>                                |                                                     |                                                        |
| Married                                              | 1.09 (0.92-1.30)                                    | 1.05 (0.89-1.23)                                       |
|                                                      |                                                     |                                                        |
| <b>Environment of Care Factors</b>                   |                                                     |                                                        |
| <b>Fiscal year of admission</b>                      |                                                     |                                                        |
| 2009                                                 | Ref                                                 | Ref                                                    |
| 2010                                                 | 1.23 (1.00-1.52)                                    | 1.05 (0.87-1.26)                                       |
| 2011                                                 | 1.17 (0.92-1.50)                                    | 0.86 (0.72-1.03)                                       |
| 2012                                                 | 1.65 (1.25-2.17)**                                  | 1.08 (0.89-1.29)                                       |
| 2013                                                 | 1.23 (0.95-1.58)                                    | 0.98 (0.80-1.19)                                       |
| 2014                                                 | 1.24 (0.92-1.67)                                    | 1.11 (0.90-1.37)                                       |
| 2015                                                 | 1.37 (1.01-1.85)*                                   | 1.12 (0.90-1.39)                                       |
| <b>Admission source</b>                              |                                                     |                                                        |
| Acute hospital                                       | Ref                                                 | Ref                                                    |
| Community                                            | 0.70 (0.58-0.84)**                                  | 0.80 (0.68-0.93)**                                     |
| Nursing home                                         | 0.71 (0.53-0.96)*                                   | 0.66 (0.50-0.87)**                                     |
| Other                                                | 0.72 (0.52-1.00)                                    | 0.93 (0.64-1.35)                                       |
| <b>Hospitalization in 90 days prior to admission</b> | 1.02 (0.90-1.16)                                    | 1.00 (0.90-1.11)                                       |
| <b>Next of kin relationship to the Veteran‡</b>      |                                                     |                                                        |
| Spouse                                               | Ref                                                 | Ref                                                    |
| Child                                                | 1.17 (0.98-1.39)                                    | 1.03 (0.87-1.22)                                       |
| Sibling                                              | 0.94 (0.73-1.20)                                    | 0.95 (0.76-1.19)                                       |
| Other relative                                       | 1.20 (0.93-1.55)                                    | 0.95 (0.67-1.33)                                       |
| Friend or other specified person of unknown relation | 1.09 (0.81-1.45)                                    | 0.97 (0.75-1.25)                                       |

|                                                                           |                    |                   |
|---------------------------------------------------------------------------|--------------------|-------------------|
| <b>Distance from next of kin ZIP code centroid to the CLC<sup>‡</sup></b> |                    |                   |
| Quartile 1                                                                | Ref                | Ref               |
| Quartile 2                                                                | 1.06 (0.92-1.22)   | 0.97 (0.85-1.09)  |
| Quartile 3                                                                | 1.01 (0.86-1.19)   | 1.03 (0.90-1.17)  |
| Quartile 4                                                                | 0.95 (0.80-1.14)   | 0.91 (0.79-1.04)  |
|                                                                           |                    |                   |
| <b>Facility Factors</b>                                                   |                    |                   |
| <b>US Census region of the CLC</b>                                        |                    |                   |
| Northeast                                                                 | Ref                | Ref               |
| Midwest                                                                   | 1.15 (0.86-1.55)   | 1.03 (0.84-1.27)  |
| South                                                                     | 1.17 (0.89-1.54)   | 1.16 (0.94-1.44)  |
| West                                                                      | 1.45 (1.07-1.96)*  | 1.32 (1.00-1.74)* |
| <b>Urban Influence Code for the CLC</b>                                   |                    |                   |
| Large metro                                                               | Ref                | Ref               |
| Small metro                                                               | 1.07 (0.80-1.42)   | 1.00 (0.82-1.22)  |
| Micropolitan                                                              | 1.32 (0.95-1.82)   | 1.23 (0.94-1.61)  |
| Noncore rural                                                             | 0.44 (0.28-0.70)** | 1.16 (0.82-1.64)  |
| <b>Complexity Level of the parent station</b>                             |                    |                   |
| 1a (Highest)                                                              | Ref                | Ref               |
| 1b                                                                        | 0.68 (0.51-0.91)** | 1.05 (0.84-1.30)  |
| 1c                                                                        | 0.70 (0.51-0.97)*  | 0.90 (0.74-1.10)  |
| 2                                                                         | 0.83 (0.57-1.19)   | 0.95 (0.74-1.22)  |
| 3 (Least Complex)                                                         | 0.80 (0.55-1.15)   | 1.03 (0.80-1.33)  |
| <b>Bed Size of CLC</b>                                                    |                    |                   |
| >120 beds                                                                 | Ref                | Ref               |
| 60-120 beds                                                               | 0.89 (0.69-1.14)   | 0.90 (0.73-1.10)  |
| <60 beds                                                                  | 0.84 (0.67-1.06)   | 0.79 (0.66-0.95)* |
| <b>Physician turnover rate</b>                                            |                    |                   |
| Quartile 1                                                                | Ref                | Ref               |
| Quartile 2                                                                | 1.03 (0.83-1.27)   | 0.90 (0.76-1.07)  |
| Quartile 3                                                                | 1.08 (0.87-1.33)   | 0.95 (0.81-1.12)  |
| Quartile 4                                                                | 1.07 (0.85-1.35)   | 0.89 (0.75-1.05)  |
| <b>Nurse turnover rate</b>                                                |                    |                   |
| Quartile 1                                                                | Ref                | Ref               |
| Quartile 2                                                                | 0.93 (0.73-1.18)   | 0.92 (0.78-1.09)  |
| Quartile 3                                                                | 0.87 (0.65-1.17)   | 0.84 (0.70-1.02)  |
| Quartile 4                                                                | 0.81 (0.61-1.08)   | 0.76 (0.60-0.97)* |
| <b>Pharmacist turnover rate</b>                                           |                    |                   |
| Quartile 1                                                                | Ref                | Ref               |
| Quartile 2                                                                | 1.05 (0.86-1.28)   | 0.86 (0.71-1.04)  |
| Quartile 3                                                                | 1.20 (0.99-1.44)   | 0.89 (0.75-1.06)  |
| Quartile 4                                                                | 1.20 (0.99-1.44)   | 0.93 (0.78-1.10)  |

|                                                                                                    |                    |                    |
|----------------------------------------------------------------------------------------------------|--------------------|--------------------|
| <b>Practical nurse turnover</b>                                                                    |                    |                    |
| Quartile 1                                                                                         | Ref                | Ref                |
| Quartile 2                                                                                         | 1.29 (1.05-1.59)*  | 1.04 (0.87-1.24)   |
| Quartile 3                                                                                         | 1.28 (1.03-1.59)*  | 1.09 (0.92-1.30)   |
| Quartile 4                                                                                         | 1.19 (0.94-1.49)   | 1.13 (0.96-1.35)   |
| <b>Psychology Turnover</b>                                                                         |                    |                    |
| Quartile 1                                                                                         | Ref                | Ref                |
| Quartile 2                                                                                         | 1.28 (1.04-1.58)*  | 0.97 (0.81-1.15)   |
| Quartile 3                                                                                         | 1.10 (0.87-1.39)   | 0.81 (0.69-0.94)** |
| Quartile 4                                                                                         | 0.89 (0.72-1.12)   | 0.73 (0.60-0.89)** |
| <b>Cardiovascular Risk Factors</b>                                                                 |                    |                    |
| <b>Number of qualifying conditions (coronary artery disease, stroke/transient ischemic attack)</b> |                    |                    |
| 1                                                                                                  | Ref                | Ref                |
| 2                                                                                                  | 0.86 (0.72-1.03)   | 0.93 (0.81-1.08)   |
| <b>Diabetes</b>                                                                                    | 0.86 (0.77-0.97)*  | 0.87 (0.78-0.96)** |
| <b>Congestive heart failure</b>                                                                    | 0.88 (0.78-0.99)*  | 1.13 (1.01-1.26)*  |
| <b>Hypertension</b>                                                                                | 1.17 (0.93-1.46)   | 0.82 (0.66-1.02)   |
| <b>Hyperlipidemia</b>                                                                              | 0.99 (0.88-1.12)   | 0.96 (0.86-1.07)   |
| <b>Venous Thromboembolism</b>                                                                      | 0.95 (0.79-1.14)   | 1.25 (1.09-1.43)** |
| <b>Atrial Fibrillation</b>                                                                         | 0.89 (0.78-1.02)   | 1.11 (0.96-1.29)   |
| <b>Recent stroke</b>                                                                               | 0.95 (0.79-1.14)   | 1.04 (0.89-1.21)   |
| <b>Recent myocardial infarction (MI)</b>                                                           | 0.91 (0.73-1.13)   | 0.64 (0.52-0.79)** |
| <b>Current Smoker</b>                                                                              | 1.02 (0.83-1.26)   | 1.21 (1.01-1.45)*  |
| <b>Body Mass Index</b>                                                                             |                    |                    |
| Normal or healthy weight (18.5 to <25.0)                                                           | Ref                | Ref                |
| Underweight (<18.5)                                                                                | 1.02 (0.86-1.20)   | 1.15 (0.95-1.40)   |
| Overweight (25.0 to <30.0)                                                                         | 1.14 (0.99-1.31)   | 1.07 (0.94-1.21)   |
| Obese (≥30)                                                                                        | 1.06 (0.88-1.28)   | 0.99 (0.86-1.13)   |
| <b>Markers of poor prognosis</b>                                                                   |                    |                    |
| <b>Number of Elixhauser comorbidities</b>                                                          |                    |                    |
| 0-1                                                                                                | Ref                | Ref                |
| 2-3                                                                                                | 1.34 (1.03-1.76)*  | 1.15 (0.91-1.45)   |
| 4-5                                                                                                | 1.39 (1.05-1.84)*  | 1.03 (0.82-1.29)   |
| >5                                                                                                 | 1.50 (1.12-2.00)** | 1.17 (0.92-1.50)   |
| <b>Advanced dementia</b>                                                                           | 1.17 (1.02-1.34)*  | 0.92 (0.79-1.06)   |
| <b>Recent weight loss</b>                                                                          | 1.08 (0.96-1.21)   | 1.14 (1.01-1.28)*  |
| <b>Poor appetite</b>                                                                               | 1.16 (1.03-1.31)*  | 1.10 (0.99-1.23)   |
| <b>Renal failure</b>                                                                               | 1.17 (1.00-1.37)*  | 1.19 (1.04-1.36)*  |
| <b>Dehydration</b>                                                                                 | 1.05 (0.63-1.77)   | 0.97 (0.57-1.65)   |
| <b>Acute change in mental status</b>                                                               | 1.08 (0.89-1.33)   | 1.18 (1.02-1.37)*  |

|                                                                             |                   |                    |
|-----------------------------------------------------------------------------|-------------------|--------------------|
| <b>Shortness of breath</b>                                                  | 0.86 (0.76-0.97)* | 1.10 (0.99-1.23)   |
| <b>Cancer</b>                                                               | 1.06 (0.94-1.19)  | 1.19 (1.06-1.34)** |
| <b>Swallowing Problems</b>                                                  | 1.09 (0.96-1.25)  | 0.94 (0.83-1.08)   |
| <b>IV feeding tube</b>                                                      | 1.04 (0.84-1.30)  | 1.42 (1.20-1.68)** |
| <b>Mechanical diet</b>                                                      | 1.04 (0.92-1.18)  | 1.04 (0.92-1.18)   |
| <b>ADL score</b>                                                            |                   |                    |
| 0 - <1                                                                      | Ref               | Ref                |
| 1 to <2                                                                     | 1.09 (0.87-1.37)  | 0.88 (0.73-1.05)   |
| 2 to <3                                                                     | 1.27 (1.00-1.61)* | 0.95 (0.79-1.14)   |
| 3 to <4                                                                     | 1.23 (0.96-1.59)  | 1.11 (0.92-1.34)   |
| 4                                                                           | 1.28 (0.96-1.71)  | 1.23 (0.97-1.56)   |
| <b>Aggressive Behavior</b>                                                  |                   |                    |
| None                                                                        | Ref               | Ref                |
| Moderate                                                                    | 1.08 (0.89-1.30)  | 1.08 (0.93-1.26)   |
| Severe                                                                      | 1.13 (0.89-1.43)  | 0.97 (0.76-1.25)   |
| Very severe                                                                 | 0.99 (0.60-1.62)  | 1.19 (0.84-1.69)   |
| <b>Presence of any pain</b>                                                 | 1.05 (0.93-1.19)  | 0.99 (0.89-1.10)   |
| <b>History of falls, hip fracture, and other fractures in past 180 days</b> | 1.03 (0.93-1.13)  | 1.01 (0.91-1.12)   |
| <b>Medications prescribed which may impact aspirin prescribing</b>          |                   |                    |
| Anti- platelet agents                                                       | 0.86 (0.73-1.02)  | 0.99 (0.86-1.12)   |
| Anti-thrombotic agents                                                      | 1.04 (0.91-1.19)  | 1.13 (1.00-1.27)*  |
| H-2 Receptor antagonists (H2Ras)                                            | 0.95 (0.79-1.15)  | 0.86 (0.72-1.04)   |
| Proton pump inhibitors (PPIs)                                               | 1.15 (1.03-1.30)* | 0.96 (0.86-1.08)   |
| Non-steroidal anti-inflammatory drugs (NSAIDs)                              | 1.02 (0.78-1.32)  | 0.95 (0.76-1.19)   |
|                                                                             |                   |                    |

\*p<0.05, \*\*p<0.01



Supplementary Table S-2: Sensitivity Analysis: Multivariable Subdistribution Hazard Ratios (SDHRs) from competing risk models assessing predictors of discontinuation of aspirin, by explicit documentation of limited prognosis (LP) at admission, using alternative discontinuation variable requiring 30-day gap in use (n=9,430).

|                                                      | Explicit Documentation of Limited Prognosis n=2,593 | No Explicit Documentation of Limited Prognosis n=6,837 |
|------------------------------------------------------|-----------------------------------------------------|--------------------------------------------------------|
| <b>Demographics</b>                                  | <b>aSDHR (95% CI)</b>                               | <b>aSDHR (95% CI)</b>                                  |
| <b>Age at admission</b>                              |                                                     |                                                        |
| 65-74                                                | Ref                                                 | Ref                                                    |
| 75-84                                                | 0.95 (0.76-1.19)                                    | 0.93 (0.79-1.11)                                       |
| ≥85                                                  | 0.84 (0.66-1.06)                                    | 0.97 (0.81-1.17)                                       |
| <b>Sex</b>                                           |                                                     |                                                        |
| Female                                               | 0.87 (0.51-1.49)                                    | 1.08 (0.55-2.15)                                       |
| <b>Race/ethnicity</b>                                |                                                     |                                                        |
| White                                                | Ref                                                 | Ref                                                    |
| Black                                                | 1.14 (0.90-1.45)                                    | 1.02 (0.86-1.22)                                       |
| Hispanic                                             | 1.34 (0.88-2.04)                                    | 1.63 (1.22-2.17)**                                     |
| Other                                                | 1.15 (0.69-1.94)                                    | 1.52 (1.11-2.08)**                                     |
| <b>Marital status</b>                                |                                                     |                                                        |
| Married                                              | 1.08 (0.87-1.34)                                    | 1.03 (0.84-1.26)                                       |
|                                                      |                                                     |                                                        |
| <b>Environment of Care Factors</b>                   |                                                     |                                                        |
| <b>Fiscal year of admission</b>                      |                                                     |                                                        |
| 2009                                                 | Ref                                                 | Ref                                                    |
| 2010                                                 | 1.06 (0.78-1.44)                                    | 1.14 (0.92-1.40)                                       |
| 2011                                                 | 1.08 (0.83-1.41)                                    | 0.75 (0.59-0.95)*                                      |
| 2012                                                 | 1.32 (0.95-1.84)                                    | 1.20 (0.93-1.55)                                       |
| 2013                                                 | 0.90 (0.65-1.25)                                    | 0.98 (0.75-1.29)                                       |
| 2014                                                 | 1.08 (0.77-1.53)                                    | 1.09 (0.83-1.44)                                       |
| 2015                                                 | 1.11 (0.78-1.58)                                    | 0.98 (0.74-1.30)                                       |
| <b>Admission Source</b>                              |                                                     |                                                        |
| Acute hospital                                       | Ref                                                 | Ref                                                    |
| Community                                            | 0.78 (0.64-0.96)*                                   | 0.94 (0.77-1.13)                                       |
| Nursing home                                         | 0.73 (0.52-1.03)                                    | 0.74 (0.52-1.05)                                       |
| Other                                                | 0.69 (0.45-1.05)                                    | 0.98 (0.62-1.52)                                       |
| <b>Hospitalization in 90 days prior to admission</b> | 1.08 (0.90-1.31)                                    | 1.01 (0.88-1.16)                                       |
| <b>Next of kin relationship to the Veteran‡</b>      |                                                     |                                                        |
| Spouse                                               | Ref                                                 | Ref                                                    |
| Child                                                | 1.28 (1.01-1.64)*                                   | 1.02 (0.84-1.24)                                       |
| Sibling                                              | 1.17 (0.83-1.66)                                    | 0.91 (0.70-1.19)                                       |
| Other relative                                       | 0.86 (0.55-1.35)                                    | 0.97 (0.63-1.48)                                       |
| Friend or other specified person of unknown relation | 1.08 (0.73-1.60)                                    | 0.79 (0.55-1.14)                                       |

|                                                                           |                   |                   |
|---------------------------------------------------------------------------|-------------------|-------------------|
| <b>Distance from next of kin ZIP code centroid to the CLC<sup>‡</sup></b> |                   |                   |
| Quartile 1                                                                | Ref               | Ref               |
| Quartile 2                                                                | 1.24 (1.04-1.47)* | 0.96 (0.81-1.13)  |
| Quartile 3                                                                | 1.18 (0.96-1.44)  | 0.89 (0.76-1.05)  |
| Quartile 4                                                                | 0.91 (0.72-1.15)  | 0.84 (0.70-1.02)  |
|                                                                           |                   |                   |
| <b>Facility Factors</b>                                                   |                   |                   |
| <b>US Census region of the CLC</b>                                        |                   |                   |
| Northeast                                                                 | Ref               | Ref               |
| Midwest                                                                   | 1.10 (0.79-1.52)  | 0.90 (0.70-1.17)  |
| South                                                                     | 1.14 (0.86-1.51)  | 1.08 (0.86-1.36)  |
| West                                                                      | 1.46 (1.03-2.07)* | 1.19 (0.86-1.63)  |
| <b>Urban Influence Code for the CLC</b>                                   |                   |                   |
| Large metro                                                               | Ref               | Ref               |
| Small metro                                                               | 1.14 (0.81-1.60)  | 1.16 (0.94-1.43)  |
| Micropolitan                                                              | 1.48 (0.98-2.24)  | 1.29 (0.99-1.67)  |
| Noncore rural                                                             | 0.62 (0.34-1.15)  | 1.33 (0.75-2.36)  |
| <b>Complexity Level of the parent station</b>                             |                   |                   |
| 1a (Highest)                                                              | Ref               | Ref               |
| 1b                                                                        | 0.66 (0.46-0.96)* | 0.97 (0.75-1.26)  |
| 1c                                                                        | 0.67 (0.45-0.99)* | 0.81 (0.63-1.03)  |
| 2                                                                         | 0.91 (0.58-1.40)  | 0.83 (0.62-1.11)  |
| 3 (Least Complex)                                                         | 0.76 (0.50-1.17)  | 0.88 (0.65-1.19)  |
| <b>Bed Size of CLC</b>                                                    |                   |                   |
| >120 beds                                                                 | Ref               | Ref               |
| 60-120 beds                                                               | 0.89 (0.66-1.22)  | 0.85 (0.65-1.12)  |
| <60 beds                                                                  | 0.91 (0.68-1.21)  | 0.76 (0.61-0.96)* |
| <b>Physician turnover rate</b>                                            |                   |                   |
| Quartile 1                                                                | Ref               | Ref               |
| Quartile 2                                                                | 1.07 (0.85-1.34)  | 0.91 (0.72-1.14)  |
| Quartile 3                                                                | 1.08 (0.82-1.41)  | 1.04 (0.85-1.27)  |
| Quartile 4                                                                | 1.14 (0.87-1.49)  | 0.92 (0.74-1.14)  |
| <b>Nurse turnover rate</b>                                                |                   |                   |
| Quartile 1                                                                | Ref               | Ref               |
| Quartile 2                                                                | 0.85 (0.63-1.15)  | 0.86 (0.68-1.09)  |
| Quartile 3                                                                | 0.88 (0.62-1.23)  | 0.86 (0.68-1.10)  |
| Quartile 4                                                                | 0.80 (0.58-1.11)  | 0.77 (0.59-1.01)  |
| <b>Pharmacist turnover rate</b>                                           |                   |                   |
| Quartile 1                                                                | Ref               | Ref               |
| Quartile 2                                                                | 1.08 (0.84-1.38)  | 0.89 (0.69-1.16)  |
| Quartile 3                                                                | 1.30 (1.01-1.69)* | 0.90 (0.70-1.14)  |
| Quartile 4                                                                | 1.14 (0.89-1.46)  | 0.99 (0.76-1.29)  |

|                                                                                                    |                    |                    |
|----------------------------------------------------------------------------------------------------|--------------------|--------------------|
| <b>Practical nurse turnover</b>                                                                    |                    |                    |
| Quartile 1                                                                                         | Ref                | Ref                |
| Quartile 2                                                                                         | 1.44 (1.11-1.87)** | 1.05 (0.81-1.35)   |
| Quartile 3                                                                                         | 1.47 (1.13-1.91)** | 1.09 (0.88-1.36)   |
| Quartile 4                                                                                         | 1.20 (0.86-1.66)   | 1.19 (0.95-1.48)   |
| <b>Psychology Turnover</b>                                                                         |                    |                    |
| Quartile 1                                                                                         | Ref                | Ref                |
| Quartile 2                                                                                         | 1.53 (1.18-1.99)** | 0.89 (0.71-1.12)   |
| Quartile 3                                                                                         | 1.23 (0.95-1.61)   | 0.78 (0.63-0.98)*  |
| Quartile 4                                                                                         | 1.03 (0.79-1.35)   | 0.67 (0.51-0.86)** |
|                                                                                                    |                    |                    |
| <b>Cardiovascular Risk Factors</b>                                                                 |                    |                    |
| <b>Number of qualifying conditions (coronary artery disease, stroke/transient ischemic attack)</b> |                    |                    |
| 1                                                                                                  | Ref                | Ref                |
| 2                                                                                                  | 0.83 (0.65-1.06)   | 1.04 (0.85-1.26)   |
| <b>Diabetes</b>                                                                                    | 0.91 (0.79-1.05)   | 0.92 (0.81-1.05)   |
| <b>Congestive heart failure</b>                                                                    | 0.87 (0.74-1.03)   | 1.10 (0.95-1.26)   |
| <b>Hypertension</b>                                                                                | 1.15 (0.81-1.64)   | 0.78 (0.58-1.04)   |
| <b>Hyperlipidemia</b>                                                                              | 1.04 (0.89-1.22)   | 0.91 (0.78-1.07)   |
| <b>Venous Thromboembolism</b>                                                                      | 1.17 (0.94-1.45)   | 1.34 (1.11-1.63)** |
| <b>Atrial Fibrillation</b>                                                                         | 0.94 (0.76-1.16)   | 1.17 (0.98-1.40)   |
| <b>Recent stroke</b>                                                                               | 0.93 (0.72-1.20)   | 0.91 (0.73-1.13)   |
| <b>Recent myocardial infarction (MI)</b>                                                           | 0.90 (0.68-1.18)   | 0.64 (0.47-0.89)** |
| <b>Current Smoker</b>                                                                              | 0.88 (0.68-1.15)   | 1.37 (1.07-1.74)*  |
| <b>Body Mass Index</b>                                                                             |                    |                    |
| Normal or healthy weight (18.5 to <25.0)                                                           | Ref                | Ref                |
| Underweight (<18.5)                                                                                | 1.00 (0.80-1.25)   | 1.12 (0.87-1.43)   |
| Overweight (25.0 to <30.0)                                                                         | 1.09 (0.89-1.33)   | 1.01 (0.85-1.20)   |
| Obese (≥30)                                                                                        | 1.08 (0.84-1.39)   | 1.06 (0.90-1.24)   |
|                                                                                                    |                    |                    |
| <b>Factors indicating limited prognosis</b>                                                        |                    |                    |
| <b>Number of Elixhauser conditions</b>                                                             |                    |                    |
| 0-1                                                                                                | Ref                | Ref                |
| 2-3                                                                                                | 1.57 (1.02-2.43)*  | 1.14 (0.82-1.59)   |
| 4-5                                                                                                | 1.63 (1.10-2.41)*  | 1.08 (0.77-1.50)   |
| >5                                                                                                 | 1.65 (1.08-2.52)*  | 1.17 (0.82-1.66)   |
| <b>Advanced dementia</b>                                                                           | 1.19 (1.00-1.41)   | 0.83 (0.69-0.99)*  |
| <b>Recent weight loss</b>                                                                          | 1.07 (0.90-1.27)   | 1.03 (0.89-1.21)   |
| <b>Poor appetite</b>                                                                               | 1.37 (1.17-1.59)** | 1.10 (0.97-1.25)   |
| <b>Renal failure</b>                                                                               | 1.20 (1.01-1.43)*  | 1.03 (0.87-1.22)   |
| <b>Dehydration</b>                                                                                 | 0.87 (0.37-2.07)   | 0.64 (0.29-1.44)   |
| <b>Acute change in mental status</b>                                                               | 1.12 (0.82-1.52)   | 1.12 (0.88-1.43)   |

|                                                                             |                    |                    |
|-----------------------------------------------------------------------------|--------------------|--------------------|
| <b>Shortness of breath</b>                                                  | 0.92 (0.78-1.09)   | 1.06 (0.89-1.26)   |
| <b>Cancer</b>                                                               | 1.19 (1.03-1.38)*  | 1.09 (0.91-1.30)   |
| <b>Swallowing Problems</b>                                                  | 1.14 (0.94-1.37)   | 0.98 (0.82-1.16)   |
| <b>IV feeding tube</b>                                                      | 0.96 (0.69-1.33)   | 1.43 (1.16-1.76)** |
| <b>Mechanical diet</b>                                                      | 0.98 (0.84-1.14)   | 0.99 (0.84-1.18)   |
| <b>Activities of Daily Living (ADL) score</b>                               |                    |                    |
| 0 - <1                                                                      | Ref                | Ref                |
| 1 to <2                                                                     | 1.41 (1.06-1.89)*  | 0.94 (0.73-1.22)   |
| 2 to <3                                                                     | 1.71 (1.26-2.33)** | 1.07 (0.82-1.41)   |
| 3 to <4                                                                     | 1.50 (1.06-2.12)*  | 1.17 (0.88-1.56)   |
| 4                                                                           | 1.68 (1.10-2.56)*  | 1.29 (0.92-1.80)   |
| <b>Aggressive Behavior</b>                                                  |                    |                    |
| None                                                                        | Ref                | Ref                |
| Moderate                                                                    | 0.88 (0.68-1.15)   | 0.92 (0.76-1.12)   |
| Severe                                                                      | 1.18 (0.87-1.60)   | 1.02 (0.76-1.37)   |
| Very severe                                                                 | 0.70 (0.30-1.60)   | 0.91 (0.54-1.54)   |
| <b>Presence of any pain</b>                                                 | 1.04 (0.88-1.23)   | 0.97 (0.83-1.13)   |
| <b>History of falls, hip fracture, and other fractures in past 180 days</b> | 0.98 (0.84-1.15)   | 1.06 (0.91-1.23)   |
| <b>Medications prescribed which may impact aspirin prescribing</b>          |                    |                    |
| Anti- platelet agents                                                       | 0.89 (0.70-1.12)   | 1.00 (0.85-1.18)   |
| Anti-thrombotic agents                                                      | 1.18 (0.99-1.41)   | 1.09 (0.94-1.27)   |
| H-2 Receptor antagonists (H2Ras)                                            | 0.90 (0.71-1.14)   | 1.03 (0.81-1.30)   |
| Proton pump inhibitors (PPIs)                                               | 1.03 (0.89-1.19)   | 0.96 (0.83-1.11)   |
| Non-steroidal anti-inflammatory drugs (NSAIDs)                              | 1.02 (0.69-1.52)   | 1.08 (0.80-1.45)   |
|                                                                             |                    |                    |

\*p<0.05, \*\*p<0.01

Supplementary Table S-3: Staff Turnover Rate for Sample, Stratified by Explicit Documentation of Limited Prognosis

|                                   | Full Sample (n=13,844)<br>n (%) | Explicit Documentaiton<br>of Limited<br>Prognosis/Hospice<br>(n=4,092)<br>n (%) | No Explicit Documentation of<br>Limited Prognosis/Hospice<br>(n=9,752)<br>n (%) |
|-----------------------------------|---------------------------------|---------------------------------------------------------------------------------|---------------------------------------------------------------------------------|
| <b>Physician turnover rate**</b>  |                                 |                                                                                 |                                                                                 |
| Quartile 1                        | 3,479 (25.1)                    | 1,095 (26.8)                                                                    | 2,384 (24.5)                                                                    |
| Quartile 2                        | 3,492 (25.2)                    | 958 (23.4)                                                                      | 2,534 (26.0)                                                                    |
| Quartile 3                        | 3,463 (25.0)                    | 1,066 (26.1)                                                                    | 2,397 (24.6)                                                                    |
| Quartile 4                        | 3,410 (24.6)                    | 973 (23.8)                                                                      | 2,437 (25.0)                                                                    |
| <b>Nurse turnover rate</b>        |                                 |                                                                                 |                                                                                 |
| Quartile 1                        | 3,532 (25.5)                    | 1,007 (24.6)                                                                    | 2,525 (25.9)                                                                    |
| Quartile 2                        | 3,422 (24.7)                    | 987 (24.1)                                                                      | 2,435 (25.0)                                                                    |
| Quartile 3                        | 3,447 (24.9)                    | 1,036 (25.3)                                                                    | 2,411 (24.7)                                                                    |
| Quartile 4                        | 3,443 (24.9)                    | 1,062 (26.0)                                                                    | 2,381 (24.4)                                                                    |
| <b>Pharmacist turnover rate**</b> |                                 |                                                                                 |                                                                                 |
| Quartile 1                        | 3,476 (25.1)                    | 1,158 (28.3)                                                                    | 2,318 (23.8)                                                                    |
| Quartile 2                        | 3,516 (25.4)                    | 898 (22.0)                                                                      | 2,618 (26.9)                                                                    |
| Quartile 3                        | 3,397 (24.5)                    | 957 (23.4)                                                                      | 2,440 (25.0)                                                                    |
| Quartile 4                        | 3,455 (25.0)                    | 1,079 (26.4)                                                                    | 2,376 (24.4)                                                                    |
| <b>Practical nurse turnover**</b> |                                 |                                                                                 |                                                                                 |
| Quartile 1                        | 3,477 (25.1)                    | 1,087 (26.6)                                                                    | 2,390 (24.5)                                                                    |
| Quartile 2                        | 3,461 (25.0)                    | 998 (24.4)                                                                      | 2,463 (25.3)                                                                    |
| Quartile 3                        | 3,467 (25.0)                    | 962 (23.5)                                                                      | 2,505 (25.7)                                                                    |
| Quartile 4                        | 3,439 (24.8)                    | 1,045 (25.5)                                                                    | 2,394 (24.6)                                                                    |
| <b>Psychology Turnover*</b>       |                                 |                                                                                 |                                                                                 |
| Quartile 1                        | 3,505 (25.3)                    | 1,033 (25.2)                                                                    | 2,472 (25.4)                                                                    |
| Quartile 2                        | 3,435 (24.8)                    | 1,046 (25.6)                                                                    | 2,389 (24.5)                                                                    |
| Quartile 3                        | 3,493 (25.2)                    | 965 (23.6)                                                                      | 2,528 (25.9)                                                                    |
| Quartile 4                        | 3,411 (24.6)                    | 1,048 (25.6)                                                                    | 2,363 (24.2)                                                                    |

\*p<0.05, \*\*p<0.01
